# Supplementary material
Source: PubMed Central journal article supplement (PMC4234122)
Supplement: NIHMS569582-supplement-01.pdf [file NIHMS569582-supplement-01.pdf]

**Supplemental Table 1: HCM variants**

| Gene   | Exon | Nucleotide Change                 | Protein variant  | Count | Published        |
|--------|------|-----------------------------------|------------------|-------|------------------|
| ACTC   | 2    | c.301 G>A                         | p.Glu101Lys      | 1     | Yes              |
| ACTC   | 4    | c.695 C>T                         | p.Ala232Val      | 1     | Yes              |
| MYBPC3 | 2    | c.26 -2 A>G                       |                  | 1     | Yes              |
| MYBPC3 | 2    | c.177-187 del<br>AGAGGGCACA       | p.Glu60Argfs*49  | 7     | Yes              |
| MYBPC3 | 2    | c.237 C>A                         | p.Tyr79Ter       | 1     | Yes              |
| MYBPC3 | 4    | c.481 C>A                         | p.Pro161Thr      | 1     | Yes              |
| MYBPC3 | 5    | c.506 G>A                         | p.Gly169Asp      | 1     | Yes              |
| MYBPC3 | 5    | c.557 C>T                         | p.Pro186Leu      | 1     | Yes              |
| MYBPC3 | 5    | c.646 G>A                         | p.Ala216Thr      | 1     | Yes              |
| MYBPC3 | 6    | c.655 G>C                         | p.Val219Leu      | 2     | Yes              |
| MYBPC3 | 6    | c.660 del T                       | p.Tyr220Tyrfs*78 | 1     | No               |
| MYBPC3 | 6    | c.766 G>A                         | p.Val256Ile      | 1     | Yes              |
| MYBPC3 | 6    | c.772 G>A                         | p.Glu258Lys      | 2     | Yes              |
| MYBPC3 | 7    | c.821 +1 G>A                      |                  | 3     | Yes              |
| MYBPC3 | 8    | c.833 del G                       | p.Gly277Glufs*22 | 1     | No               |
| MYBPC3 | 12   | c.1091 -2 A>G                     |                  | 3     | Yes              |
| MYBPC3 | 13   | c.1168 del C                      | p.His390Metfs*15 | 1     | Yes              |
| MYBPC3 | 13   | c.1210 C>T                        | p.Gln404Ter      | 1     | No               |
| MYBPC3 | 15   | c.1235-1236 del TT                | p.Phe412Terfs*1  | 3     | Yes              |
| MYBPC3 | 15   | c.1308 C>A                        | p.Cys436Ter      | 1     | Yes              |
| MYBPC3 | 17   | c.1409-1410 del GG                | p.Arg470Argfs*4  | 1     | Yes              |
| MYBPC3 | 17   | c.1484 G>A                        | p.Arg495Gln      | 7     | No               |
| MYBPC3 | 17   | c.1483 C>T                        | p.Arg495Trp      | 1     | Yes              |
| MYBPC3 | 17   | c.1504 C>T                        | p.Arg502Trp      | 9     | Yes <sup>a</sup> |
| MYBPC3 | 17   | c.1516 Del G                      | p.Asp506Thrfs*7  | 1     | Yes              |
| MYBPC3 | 17   | c.1543-1545 del AAC               | p.Asn515del      | 1     | Yes              |
| MYBPC3 | 17   | c.1591 G>C                        | p.Gly531Arg      | 1     | No               |
| MYBPC3 | 17   | c.1624 G>C                        | p.Glu542Gln      | 8     | Yes <sup>a</sup> |
| MYBPC3 | 18   | c.1639-1640 del GT                | p.Val547Valfs*20 | 1     | Yes              |
| MYBPC3 | 18   | c.1700-1701 del AG                | p.Glu567Glyfs*4  | 2     | Yes              |
| MYBPC3 | 18   | c.1729-1730 del TG                | p.Trp577Argfs*27 | 1     | Yes              |
| MYBPC3 | 19   | c.1805 C>T                        | p.Thr602Ile      | 1     | Yes              |
| MYBPC3 | 19   | c.1811 A>T                        | p.Aps604Val      | 1     | No               |
| MYBPC3 | 19   | c.1823 C>T                        | p.Pro608Leu      | 1     | Yes              |
| MYBPC3 | 21   | c.1999-2000 del CT, 1999<br>ins G | p.Leu667Aspfs*15 | 1     | Yes              |
| MYBPC3 | 22   | c.2096 del A                      | p.Pro699Profs*55 | 1     | Yes              |
| MYBPC3 | 22   | c.2107 G>C                        | p.Glu703Gln      | 1     | No               |
| MYBPC3 | 23   | c.2149 -2 A>G                     |                  | 1     | Yes              |
| MYBPC3 | 24   | c.2308 -2 A>G                     |                  | 1     | Yes              |
| MYBPC3 | 24   | c.2347 G>T                        | p.Val783Leu      | 1     | Yes              |
| MYBPC3 | 24   | c.2373-2374 ins G                 | p.Trp792Valfs*41 | 15    | Yes              |
| MYBPC3 | 24   | c.2374 T>C                        | p.Trp792Arg      | 3     | Yes <sup>a</sup> |

|        |    |                                    |                      |    |     |
|--------|----|------------------------------------|----------------------|----|-----|
| MYBPC3 | 24 | c.2382 Del G                       | p.Pro794Profs*26     | 1  | Yes |
| MYBPC3 | 25 | c.2431-2433 del AAG                | p.Lys814del          | 1  | Yes |
| MYBPC3 | 25 | c.2454 G>A                         | p.Trp818Ter          | 1  | No  |
| MYBPC3 | 25 | c.2455-2459 del ATGCG              | p.Met819Alafs*12     | 1  | Yes |
| MYBPC3 | 25 | c.2459 G>A                         | p.Arg820Gln          | 2  | Yes |
| MYBPC3 | 25 | c.2490-2491 ins T                  | p.His831Serfs*2      | 2  | Yes |
| MYBPC3 | 25 | c.2503 C>A                         | p.Arg835Ser          | 1  | No  |
| MYBPC3 | 25 | c.2527 G>T                         | p.Glu843Ter          | 1  | Yes |
| MYBPC3 | 25 | c.2541 C>G                         | p.Tyr847Ter          | 3  | Yes |
| MYBPC3 | 25 | c.2556 del C                       | p.Ile852Metfs*27     | 1  | Yes |
| MYBPC3 | 25 | c.2555-2556 ins T, subs G>T        | p.Ile852Ilefs*32     | 2  | Yes |
| MYBPC3 | 25 | c.2558 del G                       | p.Gly853Alafs*26     | 1  | Yes |
| MYBPC3 | 26 | c.2670 G>A                         | p.Trp890Ter          | 5  | No  |
| MYBPC3 | 26 | c.2735 G>T                         | p.Gly912Val          | 1  | No  |
| MYBPC3 | 27 | c.2738 -2 A>G                      |                      | 1  | No  |
| MYBPC3 | 27 | c.2748 G>A                         | p.Trp916Ter          | 1  | Yes |
| MYBPC3 | 27 | c.2780-2781 ins CA                 | p.Thr927Thrfs*5      | 1  | Yes |
| MYBPC3 | 27 | c.2827 C>T                         | p.Arg943Ter          | 3  | Yes |
| MYBPC3 | 27 | c.2864-2865 del CT                 | p.Pro955Argfs*95     | 10 | Yes |
| MYBPC3 | 27 | c.2873 C>T                         | p.Thr958Ile          | 1  | Yes |
| MYBPC3 | 27 | c.2905 C>T                         | p.Gln969Ter          | 1  | Yes |
| MYBPC3 | 27 | c.2905 +1 G>A                      |                      | 1  | Yes |
| MYBPC3 | 28 | c.2993 A>G                         | p.Gln998Arg          | 1  | No  |
| MYBPC3 | 29 | c.3064 C>T                         | p.Arg1022Cys         | 1  | No  |
| MYBPC3 | 29 | c.3065 G>C                         | p.Arg1022Pro         | 1  | Yes |
| MYBPC3 | 29 | c.3083 C>G                         | p.Thr1028Ser         | 1  | Yes |
| MYBPC3 | 29 | c.3124-3125 ins AA                 | p.Thr1042Lysfs*5     | 2  | Yes |
| MYBPC3 | 29 | c.3181 C>T                         | p.Gln1061Ter         | 1  | Yes |
| MYBPC3 | 30 | c.3226-3227 ins T                  | p.Asp1076Valfs*6     | 2  | Yes |
| MYBPC3 | 30 | c.3233 G>A                         | p.Trp1078Ter         | 1  | No  |
| MYBPC3 | 30 | c.3288 del G                       | p.Glu1096Aspfs*93    | 2  | Yes |
| MYBPC3 | 30 | c.3330 + 2 T>G                     |                      | 17 | Yes |
| MYBPC3 | 31 | c.3372 C>A                         | p.Cys1124Ter         | 1  | Yes |
| MYBPC3 | 31 | c.3337 T>A                         | p.Phe1113Ile         | 2  | Yes |
| MYBPC3 | 31 | c.3407-3409 del ACT                | p.Tyr1136Phefs*139   | 1  | No  |
| MYBPC3 | 31 | c.3476-3479 dup TTAT               | p.Ile1160Ilefs*10    | 1  | No  |
| MYBPC3 | 32 | c.3512 del A                       | p.Asn1171Thrfs*18    | 1  | No  |
| MYBPC3 | 32 | c.3548 T>G                         | p.Phe1183Cys         | 1  | No  |
| MYBPC3 | 32 | c.3565-3567 del AAC                | p.Asn1189Argfs*86    | 1  | Yes |
| MYBPC3 | 32 | c.3572 C>T                         | p.Ser1191Leu         | 1  | No  |
| MYBPC3 | 32 | c.3611-3117 in GCTGCTT             | p.Val1204Valfs*6     | 1  | Yes |
| MYBPC3 | 32 | c.3613 C>T                         | p.Arg1205Trp         | 1  | Yes |
| MYBPC3 | 32 | c.3637 +1 G>A                      |                      | 1  | Yes |
| MYBPC3 | 33 | c.3697 C>T                         | p.Gln1233Ter         | 9  | Yes |
| MYBPC3 | 33 | c.3716 A>G                         | p.Glu1239Gly         | 1  | No  |
| MYBPC3 | 33 | c.3739 G>A                         | p.Asp1247Asn         | 1  | No  |
| MYBPC3 | 33 | c.3742-3759 dup CGGGCCATCTATGTCTGC | p.Gly1248-Cys1253dup | 6  | Yes |

|        |    |                     |                   |    |                  |
|--------|----|---------------------|-------------------|----|------------------|
| MYBPC3 | 33 | c.3746 G>T          | p.Gly1249Val      | 1  | Yes              |
| MYBPC3 | 33 | c.3763 G>A          | p.Ala1255Thr      | 1  | Yes              |
| MYBPC3 | 33 | c.3767-3769 del CCA | p.Thr1256Asnfs*19 | 1  | Yes              |
| MYBPC3 | 33 | c.3771 C>A          | p.Asn1257Lys      | 2  | No               |
| MYBPC3 | 33 | c.3775 C>T          | p.Gln1259Ter      | 1  | No               |
| MYBPC3 | 33 | c.3791 G>A          | p.Cys1264Tyr      | 1  | Yes              |
| MYBPC3 | 34 | c.3820 C>T          | p.Asn1274Ter      | 1  | No               |
| MYBPC3 | 34 | c.3776 del          | p.Ala1330Ter      | 1  | No               |
| MYBPC3 | 34 | c.3814 -1 G>A       |                   | 1  | No               |
|        |    |                     |                   |    |                  |
| MYH7   | 3  | c.154 G>A           | p.Val52Met        | 1  | No               |
| MYH7   | 4  | c.260 T>C           | p.Ile87Thr        | 1  | No               |
| MYH7   | 4  | c.343 T>C           | p.Tyr115His       | 1  | Yes              |
| MYH7   | 5  | c.428 G>A           | p.Arg143Gln       | 1  | Yes              |
| MYH7   | 7  | c.595 G>A           | p.Ala199Thr       | 1  | No               |
| MYH7   | 7  | c.619 A>C           | p.Lys207Gln       | 1  | Yes              |
| MYH7   | 9  | c.789 A>G           | p.Ile263Met       | 1  | No               |
| MYH7   | 11 | c.935 T>G           | p.Phe312Cys       | 1  | No               |
| MYH7   | 12 | c.1046 T>C          | p.Met349Thr       | 2  | Yes              |
| MYH7   | 12 | c.1063 G>A          | p.Ala355Thr       | 1  | Yes              |
| MYH7   | 13 | c.1154 C>T          | p.Ala385Val       | 1  | No               |
| MYH7   | 13 | c.1220 G>T          | p.Gly407Val       | 1  | No               |
| MYH7   | 13 | c.1208 G>T          | p.Arg403Leu       | 1  | Yes              |
| MYH7   | 13 | c.1208 G>A          | p.Arg403Gln       | 4  | Yes              |
| MYH7   | 13 | c.1207 C>T          | p.Arg403Trp       | 1  | Yes              |
| MYH7   | 13 | c.1210 G>A          | p.Val404Met       | 1  | No               |
| MYH7   | 13 | c.1224 T>G          | p.Asn408Lys       | 1  | No               |
| MYH7   | 13 | c.1231 G>A          | p.Val411Ile       | 1  | Yes              |
| MYH7   | 14 | c.1283 C>T          | p.Ala428Val       | 1  | Yes              |
| MYH7   | 14 | c.1319 T>C          | p.Val440Ala       | 1  | Yes              |
| MYH7   | 14 | c.1318 G>A          | p.Val440Met       | 1  | No               |
| MYH7   | 14 | c.1357 C>T          | p.Arg453Cys       | 1  | Yes              |
| MYH7   | 15 | c.1491 G>T          | p.Glu497Asp       | 2  | Yes              |
| MYH7   | 15 | c.1532 T>C          | p.Ile511Thr       | 1  | No               |
| MYH7   | 15 | c.1544 T>G          | p.Met515Arg       | 1  | No               |
| MYH7   | 15 | c.1570 A>C          | p.Ile524Leu       | 1  | No               |
| MYH7   | 16 | c.1750 G>A          | p.Gly584Ser       | 2  | Yes              |
| MYH7   | 16 | c.1816 G>A          | p.Val606Met       | 2  | Yes              |
| MYH7   | 18 | c.1979 C>A          | p.Thr660Asn       | 1  | No               |
| MYH7   | 18 | c.1987 C>T          | p.Arg663Cys       | 1  | Yes              |
| MYH7   | 18 | c.1988 G>A          | p.Arg663His       | 14 | Yes <sup>a</sup> |
| MYH7   | 19 | c.2080 C>T          | p.Arg694Cys       | 2  | Yes              |
| MYH7   | 19 | c.2146 G>A          | p.Gly716Arg       | 1  | Yes              |
| MYH7   | 19 | c.2156 G>T          | p.Arg719Leu       | 1  | No               |
| MYH7   | 19 | c.2156 G>A          | p.Arg719Gln       | 4  | Yes              |
| MYH7   | 20 | c.2207 T>C          | p.Ile736Thr       | 1  | Yes              |
| MYH7   | 20 | c.2206 A>G          | p.Ile736Val       | 1  | Yes              |
| MYH7   | 20 | c.2221 G>C          | p.Gly741Arg       | 2  | Yes              |

|      |    |                     |              |   |                  |
|------|----|---------------------|--------------|---|------------------|
| MYH7 | 20 | c.2221 G>T          | p.Gly741Trp  | 4 | Yes              |
| MYH7 | 21 | c.2288 T>G          | p.Val763Gly  | 1 | Yes              |
| MYH7 | 21 | c.2333 A>T          | p.Asp778Val  | 1 | Yes              |
| MYH7 | 21 | c.2389 G>A          | p.Ala797Thr  | 2 | Yes <sup>a</sup> |
| MYH7 | 22 | c.2539-2541 Del AAG | p.Lys847del  | 1 | No               |
| MYH7 | 22 | c.2572 C>T          | p.Arg858Cys  | 1 | No               |
| MYH7 | 22 | c.2594 A>T          | p.Lys865Met  | 1 | No               |
| MYH7 | 22 | c.2606 G>A          | p.Arg869His  | 2 | No               |
| MYH7 | 22 | c.2609 G>A          | p.Arg870His  | 1 | Yes              |
| MYH7 | 23 | c.2681 A>G          | p.GluE894Gly | 4 | No               |
| MYH7 | 23 | c.2680 G>C          | p.Glu894Gln  | 1 | Yes              |
| MYH7 | 23 | c.2700 T>A          | p.Asp900Glu  | 1 | No               |
| MYH7 | 23 | c.2717 A>G          | p.Asp906Gly  | 4 | Yes              |
| MYH7 | 23 | c.2722 C>G          | p.Leu908Val  | 8 | Yes              |
| MYH7 | 23 | c.2791 G>A          | p.Glu921Lys  | 1 | No               |
| MYH7 | 23 | c.2770 G>A          | p.Glu924Lys  | 3 | Yes              |
| MYH7 | 23 | c.2791 G>A          | p.Glu931Lys  | 1 | No               |
| MYH7 | 23 | c.2857 G>C          | p.Asp953His  | 1 | No               |
| MYH7 | 25 | c.3133 C>T          | p.Arg1045Cys | 1 | No               |
| MYH7 | 25 | c.3152 C>T          | p.Ala1051Val | 1 | No               |
| MYH7 | 25 | c.3169 G>A          | p.Gly1057Ser | 2 | No               |
| MYH7 | 27 | c.3358 G>A          | p.Glu1120Lys | 1 | No               |
| MYH7 | 27 | c.3397 G>A          | p.Glu1133Lys | 1 | No               |
| MYH7 | 30 | c.4031 G>A          | p.Arg1344Gln | 1 | No               |
| MYH7 | 30 | c.4066 G>A          | p.Glu1356Lys | 2 | No               |
| MYH7 | 30 | c.4130 C>T          | p.Thr1377Met | 4 | No               |
| MYH7 | 32 | c.4377 G>T          | p.Lys1459Asn | 2 | Yes <sup>a</sup> |
| MYH7 | 32 | c.4487 A>C          | p.Glu1496Ala | 1 | No               |
| MYH7 | 33 | c.4537 A>T          | p.Thr1513Ser | 1 | No               |
| MYH7 | 34 | c.4817 G>A          | p.Arg1606His | 1 | No               |
| MYH7 | 35 | c.5135 G>A          | p.Agr1712Gln | 4 | Yes              |
| MYH7 | 37 | c.5287 G>A          | p.Ala1763Thr | 1 | No               |
| MYH7 | 37 | c.5302 G>A          | p.Glu1768Lys | 2 | No               |
| MYH7 | 37 | c.5324 C>T          | p.Thr1775Ile | 1 | No               |
| MYH7 | 37 | c.5329 G>A          | p.Ala1777Thr | 1 | Yes              |
| MYH7 | 39 | c.5786 C>T          | p.Thr1929Met | 1 | No               |
|      |    |                     |              |   |                  |
| MYL2 | 2  | c.37 G>A            | p.Ala13Thr   | 1 | Yes              |
| MYL2 | 2  | c.59 T>A            | p.Met20Lys   | 1 | No               |
| MYL2 | 2  | c.64 G>A            | p.Glu22Lys   | 1 | Yes              |
| MYL2 | 3  | c.103 A>G           | p.Ile35Val   | 1 | No               |
| MYL2 | 4  | c.173 G>T           | p.Arg58Leu   | 2 | No               |
| MYL2 | 4  | c.207 G>T           | p.Met69Ile   | 1 | No               |
| MYL2 | 4  | c.239 C>A           | p.Thr80Asn   | 1 | No               |
| MYL2 | 7  | c.488 A>C           | p.Glu163A    | 2 | No               |
| MYL2 | 7  | c.496 G>C           | p.Asp166His  | 1 | No               |
|      |    |                     |              |   |                  |
| MYL3 | 4  | c.461 G>A           | p.Arg154His  | 1 | Yes              |

|              |    |                   |             |   |     |
|--------------|----|-------------------|-------------|---|-----|
| <i>TNNC1</i> | 1  | c.23 C>T          | p.Ala8Val   | 1 | Yes |
| <i>TNNC1</i> | 4  | c.251 G>A         | p.Cys84Tyr  | 1 | Yes |
| <i>TNNC1</i> | 5  | c.402 G>T         | p.Glu134Asp | 1 | Yes |
| <i>TNNC1</i> | 5  | c.435 C>A         | p.Asp145Glu | 1 | Yes |
| <i>TNNI3</i> | 6  | c.318 G>C         | p.Lys106Asn | 1 | No  |
| <i>TNNI3</i> | 7  | c.407 G>A         | p.Arg136Gln | 4 | No  |
| <i>TNNI3</i> | 7  | c.422 G>A         | p.Arg141Gln | 2 | Yes |
| <i>TNNI3</i> | 7  | c.485 G>A         | p.Arg162Gln | 2 | Yes |
| <i>TNNI3</i> | 7  | c.493 G>T         | p.Glu165Ter | 1 | No  |
| <i>TNNI3</i> | 7  | c.497 C>T         | p.Ser166Phe | 2 | Yes |
| <i>TNNI3</i> | 7  | c.526 G>A         | p.Val176Met | 1 | No  |
| <i>TNNI3</i> | 8  | c.557 G>A         | p.Arg186Gln | 1 | No  |
|              |    |                   |             |   |     |
| <i>TNNT2</i> | 8  | c.236 T>C         | p.Ile79Asn  | 1 | Yes |
| <i>TNNT2</i> | 8  | c.257 A>C         | p.Asp86Ala  | 1 | Yes |
| <i>TNNT2</i> | 9  | c.274 C>T         | p.Arg92Trp  | 1 | Yes |
| <i>TNNT2</i> | 12 | c.571-573 del GAG | p.Gln191del | 1 | No  |
| <i>TNNT2</i> | 16 | c.833 G>C         | p.Arg278Pro | 1 | Yes |
|              |    |                   |             |   |     |
| <i>TPM1</i>  | 1  | c.82 G>A          | p.Asp28Asn  | 1 | No  |
| <i>TPM1</i>  | 2  | c.182 C>G         | p.Ser61Cys  | 1 | No  |
| <i>TPM1</i>  | 4  | c.345 -4 T>C      |             | 1 | No  |
| <i>TPM1</i>  | 5  | c.515 T>C         | p.Ile172Thr | 1 | Yes |
| <i>TPM1</i>  | 5  | c.554 T>G         | p.Leu185Arg | 1 | Yes |
| <i>TPM1</i>  | 6  | c.574 G>A         | p.Glu192Lys | 1 | No  |
| <i>TPM1</i>  | 7  | c.644 C>T         | p.Ser215Leu | 1 | No  |
| <i>TPM1</i>  | 9  | c.842 T>C         | p.Met281Thr | 2 | Yes |

<sup>a</sup>Variants seen in controls (frequency  $\leq 0.01\%$ ) but significantly overrepresented in patients with HCM
