# Supplementary material
Source: PubMed Central journal article supplement (PMC4234122)
Supplement: NIHMS569582-supplement-02.pdf [file NIHMS569582-supplement-02.pdf]

**Supplemental Table 2: Phenotype comparisons between MYBPC3- and MYH7-HCM**

|                                              | <b>MYBPC3-HCM</b> | <b>MYH7-HCM</b> | <b><i>P-value</i></b> |
|----------------------------------------------|-------------------|-----------------|-----------------------|
| <b>N</b>                                     | 182               | 121             |                       |
| <b>Male/female n(% male)</b>                 | 117/65 (64)       | 62/59 (51)      | .03                   |
| <b>Age at diagnosis (yrs)</b>                | 37.6 ± 15         | 36.4 ± 19       | .5                    |
| <b>MLVWT (mm)</b>                            | 22.9 ± 6          | 22.3 ± 6        | .4                    |
| <b>LVOT gradient (mmHg)</b>                  | 37.2 ± 41         | 42.7 ± 43       | .3                    |
| <b>Obstructive HCM n(%)</b>                  | 77 (42)           | 58 (47)         | .3                    |
| <b>Reverse-curve HCM n(%)</b>                | 92 (53)           | 70 (61)         | .2                    |
| <b>Family history of HCM n(%)</b>            | 91 (50)           | 59 (49)         | .8                    |
| <b>Family history of SCD n(%)</b>            | 46 (25)           | 34 (28)         | .7                    |
| <b>Family history of HCM and/or SCD n(%)</b> | 97 (53)           | 63 (52)         | .9                    |
| <b>Myectomy n(%)</b>                         | 81 (46)           | 62 (53)         | .3                    |
| <b>ICD n(%)</b>                              | 49 (28)           | 28 (24)         | .5                    |
