# Supplementary material
Source: PubMed Central journal article supplement (PMC4234122)
Supplement: NIHMS569582-supplement-03.pdf [file NIHMS569582-supplement-03.pdf]

**Supplemental Table 3: Comparisons of different scores**

| Mayo Clinic Genotype Predictor |                          | Weighted Score |                          | Score based on FHHCM and Reverse curvature alone |                          |
|--------------------------------|--------------------------|----------------|--------------------------|--------------------------------------------------|--------------------------|
| Score                          | Yield of genetic testing | Score          | Yield of genetic testing | Score                                            | Yield of genetic testing |
| -1                             | 6.4%<br>(6/94)           | -1             | 6.4%<br>(6/94)           | 0                                                | 15.7%<br>(85/541)        |
| 0                              | 14.4%<br>(32/222)        | 0              | 12.4%<br>(23/185)        | 1                                                | 47.8%<br>(176/368)       |
| 1                              | 19%<br>(47/242)          | 1              | 11.8%<br>(12/102)        | 2                                                | 68%<br>(98/144)          |
| 2                              | 41%<br>(81/197)          | 2              | 25.5%<br>(37/145)        |                                                  |                          |
| 3                              | 60%<br>(104/173)         | 3              | 31.4%<br>(37/118)        |                                                  |                          |
| 4                              | 68%<br>(61/90)           | 4              | 46.0%<br>(40/87)         |                                                  |                          |
| 5                              | 80%<br>(28/35)           | 5              | 44.6%<br>(41/92)         |                                                  |                          |
|                                |                          | 6              | 72.1%<br>(75/104)        |                                                  |                          |
|                                |                          | 7              | 56.8%<br>(31/37)         |                                                  |                          |
|                                |                          | 8              | 72.2%<br>(39/54)         |                                                  |                          |
|                                |                          | 9              | 80.0%<br>(28/35)         |                                                  |                          |

**Table comparing yield of genetic testing using different scores.** On left, Mayo Clinic genotype predictor as described in manuscript giving each parameter an equipotent weight and score of +1 (-1 for presence of mild concomitant hypertension). Middle columns uses a weighted score relative to odds ratio from multivariate analyses (reverse curve HCM: 3 points; family history of HCM, age at diagnosis <45 years: 2 points; family history of SCD, MLVWT≥20mm: 1 point; mild, concomitant hypertension: -1 point). On left, score based on reverse curve HCM and family history of HCM (FHHCM).
